1 **Increased  $\gamma$ -Site H-Bond Stability Relates to Altered  $\epsilon$ -Efficiency and A $\beta$**   
2 **Levels in the I45T Familial Alzheimer's Disease Mutant of APP**

3

4 Alexander Götz<sup>1§</sup>, Philipp Högel<sup>2§</sup>, Mara Silber<sup>3</sup>, Iro Chaitoglou<sup>2</sup>, Burkhard Luy<sup>3</sup>, Claudia  
5 Muhle-Goll<sup>3</sup>, Christina Scharnagl<sup>1\*</sup> and Dieter Langosch<sup>2\*</sup>

6

7 <sup>1</sup>Lehrstuhl für Physik synthetischer Biosysteme (E14), Technische Universität München,  
8 Maximus-von-Imhof Forum 4, 85354 Freising, Germany

9 <sup>2</sup>Center for Integrated Protein Science Munich (CIPSM) at the Lehrstuhl für Chemie der  
10 Biopolymere, Technische Universität München, Weihenstephaner Berg 3, 85354 Freising,  
11 Germany

12 <sup>3</sup>Institute of Organic Chemistry and Institute for Biological Interfaces 4, Karlsruhe Institute of  
13 Technology, Karlsruhe, Germany.

14 <sup>§</sup>These authors contributed equally.

15

16

17 \*Corresponding authors

18 D. Langosch, Lehrstuhl für Chemie der Biopolymere, Technische Universität München,  
19 Weihenstephaner Berg 3, 85354 Freising, Germany. Tel.: +49-8161-71-3500; Fax: +49-8161-  
20 71-4404; E-mail: [langosch@tum.de](mailto:langosch@tum.de)

21 C. Scharnagl, Lehrstuhl für Physik synthetischer Biosysteme (E14), Technische Universität  
22 München, Maximus-von-Imhof Forum 4, 85354 Freising, Germany. Tel.: +49-8161-71-3557;  
23 E-mail: [christina.scharnagl@tum.de](mailto:christina.scharnagl@tum.de)

24

## 1 **Abstract**

2 Cleavage of the amyloid precursor protein's (APP) transmembrane domain (TMD) by  $\gamma$ -  
3 secretase is a crucial step in the etiology of Alzheimer's Disease (AD). Mutations in the APP  
4 TMD alter cleavage and lead to familial forms of AD (FAD). The majority of FAD mutations  
5 shifts the preference of initial cleavage from  $\epsilon$ 49 to  $\epsilon$ 48, thus raising the AD-related A $\beta$ 42/A $\beta$ 40  
6 ratio. The I45T mutation is among the few FAD mutations that do not alter  $\epsilon$ -site preference,  
7 while it dramatically reduces the efficiency of  $\epsilon$ -cleavage. Here we investigate the impact of  
8 the I45T mutation on the backbone dynamics of the substrate TMD. Amide exchange  
9 experiments and molecular dynamics simulations in solvent and a lipid bilayer reveal an  
10 increased stability of amide hydrogen bonds at the  $\zeta$ - and  $\gamma$ -cleavage sites. Stiffening of the H-  
11 bond network is caused by an additional H-bond between the T45 side chain and the TMD  
12 backbone, which alters dynamics within the cleavage domain. In particular, the increased H-  
13 bond stability inhibits an upward movement of the  $\epsilon$ -sites in the I45T mutant. Thus, an altered  
14 presentation of  $\epsilon$ -sites to the active site of  $\gamma$ -secretase as a consequence of restricted local  
15 flexibility provides a rationale for reduced  $\epsilon$ -efficiency of the I45T FAD mutant.

16

## 1 Introduction

2 The intramembrane aspartyl protease  $\gamma$ -secretase cleaves the transmembrane domains (TMD)  
3 of ~90 bitopic type I transmembrane proteins.<sup>1,2</sup> Due to its involvement in Alzheimer's disease  
4 (AD), the amyloid-precursor-protein (APP) is the most extensively studied  $\gamma$ -secretase  
5 substrate.<sup>3,4</sup> Prior to cleavage by  $\gamma$ -secretase, APP's ectodomain is shed by  $\beta$ -secretase, thus  
6 generating the C99 fragment. Subsequent cleavage of C99 by  $\gamma$ -secretase results in release of  
7 the APP intracellular domain (AICD) and  $\beta$ -amyloid (A $\beta$ ) peptides of various length.<sup>5</sup> Such  
8 step-wise cleavage starts at one of two  $\epsilon$ -sites located at the cytosolic border of the C99 TMD  
9 between either residue L49 and V50 ( $\epsilon$ 49) or T48 and L49 ( $\epsilon$ 48). Cleavage gradually proceeds  
10 towards the N-terminus, releasing fragments of three or four residues and leaving A $\beta$  peptides  
11 of different length.<sup>6-11</sup> A $\beta$ 40, the most abundant A $\beta$  peptide produced from wild-type (WT)  
12 C99, is generated by cleavage along the  $\epsilon$ 49- $\zeta$ 46- $\gamma$ 43- $\gamma$ 40 pathway. A smaller amount of C99 is  
13 processed via cleavage at  $\epsilon$ 48 and  $\zeta$ 45, leading to A $\beta$ 42 and A $\beta$ 38 peptides. Of these species,  
14 A $\beta$ 42 is the most aggregation-prone and forms neurotoxic oligomers and plaques.<sup>12,13</sup> The  
15 accumulation of plaques consisting of such cell-toxic A $\beta$  peptides in the brain is a central  
16 hallmark of AD.<sup>14</sup> In familial forms of AD (FAD) an increased A $\beta$ 42/A $\beta$ 40 ratio correlates with  
17 early onset and fast progression of AD and results from point mutations in C99 or presenilin,  
18 the catalytic subunit of  $\gamma$ -secretase.<sup>1,15-21</sup> In most mutants, alterations in A $\beta$ 42/A $\beta$ 40 ratios are  
19 linked to shifting the preferential initial cleavage site from  $\epsilon$ 49 to  $\epsilon$ 48. However, switching of  
20 pathways after  $\epsilon$ -cleavage is also seen.<sup>8,9,11,22</sup> The I45T mutation is one case, where an increased  
21 A $\beta$ 42/A $\beta$ 40 ratio results from pathway switching.<sup>23</sup> In addition, I45T dramatically reduces  
22 cleavage efficiency at both  $\epsilon$ -sites.<sup>20,21,23</sup>

23 Several studies indicated that the C-terminal part of the C99 TMD helix (TM-C), which  
24 comprises the cleavage sites, is less flexible than the N-terminal region (TM-N).<sup>24-29</sup> As

1 cleavage of the peptide backbone requires access of presenilin's catalytic aspartates to the  
2 scissile bond<sup>30</sup>, a mutationally altered structural stability of the C99 TMD helix at the  $\epsilon$ -sites  
3 seemed to be an obvious explanation for altered  $\epsilon$ -cleavage.<sup>28,31,32</sup> In addition, FAD mutations  
4 in TM-C have been shown to alter hydrogen bond (H-bond) stability in a segment upstream of  
5 the  $\epsilon$ -cleavage sites which harbors the  $\gamma$  sites.<sup>29,33</sup> Those alterations relate to changed shape  
6 fluctuations of the TMD helix, which are controlled by the previously established G<sub>37</sub>G<sub>38</sub>  
7 hinge<sup>26,29,34,35</sup> and by a flexible site around T<sub>43</sub>-I<sub>45</sub>.<sup>29</sup>

8 Previously, it was shown that Thr residues in the WT C99 TMD (T43 and T48) rigidify the  
9 helix by forming H-bonds between their side chains and the main chain.<sup>26,35</sup> Mutations of T43  
10 and T48 to hydrophobic residues (e.g. Val or Ile) affect  $\epsilon$ -site preference and efficiency.<sup>15,21,36</sup>  
11 Since hydrogen bond networks determine the mechanical and thermodynamic properties of  
12 proteins, their alteration in FAD mutants of the APP TMD has been proposed to perturb the  
13 fine-tuned interplay of the conformational dynamics of the enzyme and substrate<sup>29</sup>, which is a  
14 key factor for substrate recognition and subsequent relaxation steps.<sup>37,38</sup>

15 Here, we combined amide exchange experiments with atomistic simulations in order to  
16 compare the conformational dynamics of WT and I45T mutant TMD helices. Our data confirm  
17 a more flexible TM-N compared to the very rigid TM-C. This agrees with previous  
18 results<sup>26,29,39-41</sup> but contradicts a novel interpretation of amide exchange experiments in a very  
19 recent study.<sup>42</sup> The I45T mutation stabilizes H-bonds in TM-C mainly around the  $\gamma$ -sites. As  
20 expected, this stabilization is related to a newly formed H-bond between the T45 side chain and  
21 the backbone carbonyl oxygen of I41. Around the  $\epsilon$ -sites, neither H-bond stability nor local  
22 flexibility was affected. Exhaustive sampling of the conformational space allowed us to  
23 correlate the impact of the I45T mutation on the H-bond network with altered bending and  
24 twisting motions around a flexible hinge located one turn upstream to the  $\epsilon$ -sites. These motions

- 1 may control the vertical position of the  $\epsilon$ -cleavage sites within presenilin and thus provide a
- 2 mechanistic interpretation for changed  $\epsilon$ -efficiency, but unaffected  $\epsilon$ -site preference, in the I45T
- 3 mutant.

## 1 **Results**

2 In order to provide a rationale for altered  $\gamma$ -secretase cleavage of the C99 I45T FAD mutant,  
3 we probed the structure and flexibility of its TMD in comparison to the wild-type (WT) TMD.  
4 For this purpose, a 30 amino acid long fragment of C99 was used, which covers residues S26 -  
5 K55 (A26-55). Similar C99 TMD peptides were previously shown to be good substrates for  $\gamma$ -  
6 secretase.<sup>31,43</sup> Circular dichroism (CD) spectroscopy, amide exchange experiments performed  
7 by mass spectrometry (MS) as well as NMR spectroscopy, and molecular dynamics (MD)  
8 simulations in the  $\mu$ s range were combined to study the TMD helix dynamics. The polar  
9 environment of the catalytic cleft of presenilin was mimicked by aqueous 80 % 2,2,2-  
10 trifluoroethanol (TFE).<sup>25-27,44,45</sup> This solvent mimics the polarity in the solvated interior of  
11 proteins.<sup>29,44,46,47</sup> Simulations were performed in the same solvent and in a 1-palmitoyl-2-  
12 oleoylphosphatidylcholine (POPC) bilayer. The comparison of TMD dynamics in both  
13 environments extends our previous *in silico* modeling study of the backbone dynamics of the  
14 C99 WT TMD and its FAD mutations.<sup>29</sup> Performing amide exchange in membranes was not  
15 practical as the bilayer shields the TMD helix core from exchange.<sup>48,49</sup>

16

### 17 **The I45T FAD mutation locally reduces helix flexibility**

18 CD spectra indicate that the peptides are strongly helical in 80% TFE. Normalized spectra  
19 reveal that WT and I45T share equivalent helicity (**Supplementary Fig. 1** online). To assess  
20 the TM-helices' conformational flexibility, intrahelical amide H-bond stabilities were probed  
21 by amide deuterium hydrogen exchange (DHX) in 80% TFE. For DHX, exhaustively (>98%)  
22 deuterated A26-55 peptides were diluted to a concentration of 5  $\mu$ M into protonated solvent,  
23 which leaves them in the monomeric state.<sup>27</sup> Exchange of amide deuterons to protons was

1 recorded over time at pH 5.0 and 20°C. Gradual shifting of monomodal isotopic envelopes  
2 towards lower m/z values was detected (data not shown). This is characteristic for EX2 kinetics  
3 with uncorrelated exchange of individual deuterons upon local unfolding.<sup>50,51</sup> A qualitative  
4 comparison of the overall DHX kinetics revealed nearly identical exchange kinetics for the  
5 rapidly exchanging deuterons (0-3h) of WT and I45T (**Figure 1A**, inset). With increasing  
6 incubation time, I45T showed slower exchange than WT, with a difference of ~ 1 D after 6 h.  
7 At later time points, I45T showed significantly faster exchange, resulting in a crossing of the  
8 curves at ~16 h. MD simulations could well reproduce the overall DHX kinetics  
9 (**Supplementary Fig. 2A,B** online).

10 To map the impact of the I45T mutation on local helix flexibility, site-specific amide DHX rate  
11 constants ( $k_{\text{exp,DHX}}$ ) were measured. After different periods of DHX in solution (0.1 min to 7 d  
12 at pH 5.0), we determined the deuteron contents of the c- and z-fragments resulting from  
13 electron transfer dissociation (ETD) in the gas phase. Residue-specific  $k_{\text{exp,DHX}}$  rate constants  
14 were calculated based on the respective mass shifts over time. As ETD of the original A26-55  
15 peptide was insufficient, we exchanged S26 and N27 to lysine (termed A28-55 in the following).  
16 To exclude major consequences of this sequence alteration on TMD dynamics, we compared  
17 the overall DHX of A28-55 with the DHX of A26-55. Excellent agreement was found for  
18 intermediate and long incubation times while some deviations were observed for rapidly  
19 exchanging deuterons (**Supplementary Fig. 2C** online).

20 The  $k_{\text{exp,DHX}}$  rate-profile of A28-55 reveals a rapidly exchanging TM-N, which is followed by  
21 a rather stable TM-C that harbors the  $\gamma$ -secretase cleavage sites (**Figure 1B**). The  $k_{\text{exp,DHX}}$  values  
22 are below the respective chemical amide exchange rate constants  $k_{\text{ch}}$  from G33 through M51,  
23 which indicates the participation of these residues in secondary structure, *viz.* helix formation.  
24 To validate our determination of ETD-based exchange rate constants, we reconstructed the

1 overall DHX kinetics from  $k_{\text{exp,DHX}}$  rate constants of A28-55 WT. The reconstructed kinetics  
2 show very good agreement with directly measured overall kinetics, except for very slowly  
3 exchanging deuterons that exchange somewhat too rapidly in the reconstructed kinetics  
4 (**Supplementary Fig. 3D** online). Reconstructed overall exchange kinetics also reproduce the  
5 crossing of the overall WT and I45T DHX curves (**Supplementary Fig. 3E** online). A faster  
6 exchange of TM-N over TM-C was confirmed by solution NMR measurements, using  $H_{\alpha}/HN$   
7 (TOCSY) or HN/N ( $^1H^{15}N$ -HSQC) cross peak measurements on WT A26-55 with  $^{15}N/^{13}C$   
8 labels at positions G29, G33, G37, G38, I41, V44, M51, and L52.

9 MS-ETD measurements were then employed to compare WT and I45T TMDs. For the I45T  
10 mutant, lower  $k_{\text{exp,DHX}}$  rate constants were observed from I41 to T43, while an increased rate  
11 constant was found for T45. This is in perfect agreement with the overall exchange kinetics  
12 (**Figure 1A**), assuming that I41-T43 contributes to the fast population of amides (exchanging  
13  $<16$  h), and that T45 contributes to the slow population ( $>16$  h).

14 The rate constants  $k_{\text{exp,DHX}}$  contain information on the stability of the respective amide H-bonds,  
15 the local concentration of the exchange catalyst as well as the chemical exchange rate  $k_{\text{ch}}$ .  $k_{\text{ch}}$ ,  
16 in turn, depends on (1) the pH and (2) on side-chain chemistry, i.e., primary structure. The  
17 effects of primary structure are taken into account by converting the rate constants into the free  
18 energy change of amide H-bond formation ( $\Delta G$ ), which is a measure of H-bond stability, by  
19 Linderstrom-Lang theory<sup>52</sup> (**Figure 1C**). We note that derived  $\Delta G$  values represent upper  
20 estimates of the true values.<sup>53</sup> The distribution of  $\Delta G$  values across the sequence confirms the  
21 existence of a highly flexible, Gly-rich TM-N ( $\Delta G < 2$  kcal/mol), followed by a rigid TM-C  
22 ( $\Delta G \sim 5$  kcal/mol). The I45T mutation induces a slight increase in stability from I41 to T43  
23 ( $\Delta\Delta G \approx 0.3$  kcal/mol). No differences in  $\Delta G$  is seen around position 45 which indicates that the



1 difference of  $k_{\text{exp,DHX}}$  at position 45 results from a difference in  $k_{\text{ch}}$  between Thr and Ile. Further,  
2 no difference is seen at the  $\epsilon$ - or  $\zeta$ -cleavage sites.

3 In a different approach to assess the conformational flexibility of the C99 TMD, Cao et al.<sup>42</sup>  
4 recently reported site-specific isotope fractionation factors  $\Phi$  as obtained from the ratio of  
5 NMR-derived hydrogen deuterium exchange (HDX) and DHX amide exchange rate constants  
6 that were recorded in lyso-myristoylphosphatidylglycerol (LMPG) micelles.<sup>42</sup> Generally, the  $\Phi$   
7 value reports the isotopic preference in an H-bond and it is often assumed that the equilibrium  
8 enrichment of deuterium at the amide ( $\Phi > 1$ ) indicates weak H-bonds.<sup>54</sup> Cao et al. sought to  
9 derive  $\Phi$  from the ratio of  $k_{\text{exp,HDX}} / k_{\text{exp,DHX}}$  and calculated H-bond strength  $\Delta G$  from  $\Phi$ , using  
10 an empirical relationship.<sup>42,55</sup> Although the profile of exchange rate constants in Cao et al.  
11 qualitatively matches the one found by us, the obtained  $\Delta G$  values suggested strong H-bonds  
12 within TM-N while exceptionally weak H-bonds were reported at T43, V44, and T48 of TM-  
13 C. As this is at odds with the  $\Delta G$  values reported here (**Figure 1C**), we investigated the kinetic  
14 isotope effect in 80% TFE. First, we compared global DHX and HDX kinetics of WT and I45T,  
15 as obtained from MS measurements. DHX and HDX kinetics are superimposable after scaling  
16 the latter by a factor of  $\sim 0.2$  (**Supplementary Figure 6C/D** online). The superimposability is  
17 consistent with similar  $k_{\text{exp,HDX}} / k_{\text{exp,DHX}}$  ratios for different populations of amides while the  
18 factor of 0.2 is reminiscent of the known 5-fold acceleration of the chemical DHX over HDX  
19 rate constants.<sup>56</sup> Second, we compared site-specific DHX and HDX rate constants. Since  
20 attempts to record HDX using ETD-MS were hampered by significant peak broadening,  
21 possibly resulting from hydrogen scrambling during gas phase fragmentation (data not shown),  
22 we recorded HDX and DHX by NMR spectroscopy. As a result, the  $k_{\text{exp,HDX}} / k_{\text{exp,DHX}}$  ratios  
23 tend to be  $\leq 1$  from V40 through L52; ratios at all other positions are characterized by large  
24 errors since the associated quickly exchanging amides are difficult to capture at the timescale  
25 of the experiment (**Supplementary Figure 4** online). The potential sources of the discrepancies

1 between our  $k_{\text{exp,HDX}} / k_{\text{exp,DHX}}$  ratios and the values reported by Cao et al.<sup>42</sup> and the  
2 interpretation of these ratios are discussed below.

3 In sum, our results reveal a heterogeneous distribution of backbone H-bond strength *viz* helix  
4 flexibility across the APP TMD where a flexible TM-N is connected to a more rigid TM-C. The  
5 I45T mutation slightly stabilizes the helix upstream of the mutation site.

6

### 7 **I45T stabilizes the TM-C sub-helix in solution and in a POPC bilayer**

8 To gain further mechanistic insights into the impact of the I45T mutation on the structural and  
9 dynamic properties of the APP TMD, we performed all-atom MD simulations in the  $\mu\text{s}$  range.  
10 A26-55 was simulated in 80 % TFE and a POPC bilayer. No impact of I45T on the TMD's  
11 orientation in the POPC bilayer was found (**Supplementary Fig. 7** online). In investigating the  
12 helix-stabilizing network of intrahelical H-bonds we first focused on occupancies, which  
13 represent the probability that an amide forms either an  $\alpha$ - or a  $3_{10}$  H-bond. In 80 % TFE, the H-  
14 bond occupancies roughly follow the profile of exchange rates in DHX experiments, featuring  
15 a stable TM-C and a more flexible TM-N (**Figure 2A**). Both sub-helices are connected by a  
16 region of low occupancy, spanning the region from O(L34) to NH(I41) and containing the  
17 G<sub>37</sub>G<sub>38</sub> motif. As weak H-bonds enable structural deformations of the helix, this region of low  
18 occupancy triggers bending of the TMD over the G<sub>37</sub>G<sub>38</sub> hinge.<sup>27,29,34</sup> In our simulations, the  
19 I45T mutation stabilizes the amide H-bonds at the mutation site. Concomitantly, we find a slight  
20 destabilization of the H-bond emanating from I47 but unaffected stability at the  $\epsilon$ -sites. The  
21 observed alterations of H-bond occupancies in the I45T mutant are related to an increased  
22 contribution of  $\alpha$  H-bonds, while  $3_{10}$  H-bonds contribute less than in WT (**Supplementary Fig.**  
23 **8A,B** online). Similar, albeit less pronounced, alterations of H-bond occupancies by I45T are  
24 detected in POPC (**Figure 2A** and **Supplementary Fig. 8A,B** online).

1 The stabilities of amide H-bonds are influenced by side-chain interactions.<sup>57</sup> Therefore, we  
2 quantified the packing of side-chain heavy atoms around each backbone carbonyl oxygen by  
3 packing scores ( $S_i$ ). We find that a weakly packed TM-N is connected to a more tightly packed  
4 TM-C (**Figure 2B**). Packing scores peak at V39 and V44, which is related to back-bonding of  
5 T43 and T48, whose hydroxyl groups form H-bonds with the backbone carbonyl oxygens at the  
6 respective (i-4) positions (occupancy > 98 %). As I45T harbors an additional Thr, a further peak  
7 at I41, reflects the additional H-bond between the T45 side chain and the I41 main chain.  
8 Packing profiles in POPC closely mirror the profiles found in 80 % TFE. Together, this results  
9 in a highly coupled H-bond network around the  $\zeta$  and  $\gamma$  cleavage sites as visualized in **Figure**  
10 **2C**.

11 Normalized mean-squared fluctuations (MSF) confirm above average flexibility at  $V_{36-V40}$   
12 (**Figure 2D**), as well as below average fluctuations in TM-N and TM-C. In particular  
13 fluctuations at the  $\epsilon$ -sites are lower than fluctuations of TM-N. Compared to 80 % TFE, the  
14 POPC bilayer reduces fluctuations of TM-N and increases fluctuations of TM-C. Both in  
15 solution and in the bilayer, the I45T mutation decreases MSF from A42 through T45, but not  
16 at  $\epsilon$ -sites. This finding is supported by indistinguishable distributions of rise-per residue values  
17 of  $C\alpha$ -atoms that flank the respective  $\epsilon$ -cleavage sites (**Supplementary Figure 8C/D**).

18 To summarize, an additional H-bond between the T45 side chain and the backbone carbonyl  
19 oxygen of I41 contributes to a tightly coupled H-bond network around the  $\zeta$ - and  $\gamma$ -cleavage  
20 sites. This is related to an increased stability of intrahelical H-bonds at the mutation site and at  
21 positions upstream.

22

23 **I45T Alters Global Shape Fluctuations and Relocates Hinges in TM-C**

1 Our investigation of intrahelical H-bonds revealed that the I45T mutation alters the relative  
2 importance of  $\alpha$ - and  $3_{10}$  H-bonds (**Supplementary Fig. 8A-B** online). Similar switching  
3 between  $\alpha$  and  $3_{10}$  H-bonds was attributed to shape deformations of TMD helices without  
4 disruption.<sup>58,59</sup> Therefore, we characterized shape deformations of the C99 TMD helix by  
5 analyzing bending ( $\theta$ ) and swivel ( $\Phi$ ) angles between two helical segments. The first segment  
6 (I31-M35) centers around G33 in TM-N, which is in the middle of the G<sub>29</sub>XXXG<sub>33</sub>XXXG<sub>37</sub> motif,  
7 potentially being involved in binding of C99 to presenilin.<sup>33,34,60,61</sup> The second segment is  
8 located in TM-C (I<sub>47</sub>-M<sub>51</sub>) and harbors the  $\epsilon$ -cleavage sites. Therefore,  $\theta$  and  $\Phi$  angles describe  
9 the positioning of the cleavage sites relative to a putative binding motif in TM-N. In agreement  
10 with previous studies<sup>26,27,29,34</sup>, the A26-55 WT helix bends anisotropically over the G<sub>37</sub>G<sub>38</sub> hinge  
11 in 80 % TFE (**Figure 3A/B**). The I45T mutation leads to slightly increased bending angles and  
12 shifts the direction of bending by  $\sim 20^\circ$  while reducing variations in bending direction (**Figure**  
13 **3A-C**). These differences between WT and I45T are reproduced in POPC, although the extent  
14 of bending is somewhat restricted in the membrane (**Figure 3C**).

15 Our analysis of  $\theta$  and  $\Phi$  angles provides information about the orientation of the  $\epsilon$ -cleavage  
16 sites in TM-C relative to TM-N. However, it lacks detailed information on the relative  
17 contributions of bending and twisting movements as well as the location of the dynamic regions,  
18 which coordinate them. The latter ones are commonly referred to as flexible hinges and are  
19 characterized as regions of low stability, flanked by two quasi-rigid segments. In order to detect  
20 the occurrence of hinges in the A26-55 TMD and to determine their locations as well as the  
21 type of motion they coordinate we used the DynDom program<sup>62</sup>. Our analysis confirms a second  
22 hinge located in TM-C around T<sub>43</sub>-I<sub>45</sub> in addition to the known G<sub>37</sub>G<sub>38</sub> hinge (**Figure 3E**).<sup>29</sup>  
23 Each of these hinges can act as a flexible joint by itself (single-hinge bending (B) and twisting  
24 (T) motions) or cooperatively with each other (double-hinge motions of type BB, BT, TB, and  
25 TT). In 80 % TFE, bending controlled by a single hinge (type B) is the dominant subdomain

1 motion type (~ 40 %) in the WT TMD, followed by a lower amount (~ 20 %) of twisting (type  
2 T) (**Figure 3D**). A similar preference for bending was noticed for the motions around the  
3 coupled pairs of hinges, where motion type BB, BT and TB contribute ~ 20 % to overall  
4 backbone flexibility, while type TT motion contribute only ~ 5 %. I45T increases the  
5 contribution of twisting by ~ 5 %, while reducing bending by the same amount. The preference  
6 for twisting motions in POPC as well as the higher contribution of lower-amplitude double-  
7 hinge motions at the expense of large-scale single-hinge bending (B) is consistent with  
8 restricted conformational freedom in the membrane.

9 In addition to shifting the contributions of different types of motion to the overall backbone  
10 dynamics, we also observed an impact of I45T on the propensity by which each residue  
11 contributes to hinge flexibility (**Figure 3E** and **Supplementary Fig. 9** online). Single-hinge  
12 bending (B) and twisting (T) are mainly coordinated by residues V<sub>36</sub>-V<sub>39</sub> in WT and I45T.  
13 However, the I45T mutation reduces the contribution of T<sub>43</sub>-I<sub>45</sub> to hinge flexibility and slightly  
14 shifts propensities towards the C-terminus. In the POPC bilayer hinge propensities around V<sub>36</sub>-  
15 V<sub>39</sub> are reduced, while propensities around T<sub>43</sub>-I<sub>45</sub> are slightly increased.

16

### 17 **H-Bond Dynamics Determines Motions Controlled by the Hinge at the $\zeta$ -Sites.**

18 Our analysis of hinges revealed differences between WT and I45T to be mainly located around  
19 T<sub>43</sub>-I<sub>45</sub> (**Figure 3E**). This is in good agreement with observed alterations in H-bond stabilities  
20 (**Figure 2A**). Therefore, we rationalize that alterations in H-bond open/close dynamics correlate  
21 with changes in hinge localization and the type of coordinated motion (**Figure 3D/E**). As both  
22 are affected by I45T, motions controlled by such hinges were assumed to be of functional  
23 relevance for  $\varepsilon$ -site cleavage. In order to identify those functional motions (FM), we used a

1 partial least square (PLS) model<sup>63</sup> to find the motion which is maximally correlated with the  
2 collective open and close dynamics of H-bonds emanating from V<sub>44</sub>-I<sub>47</sub>. For WT, the FM in  
3 both environments is mainly determined by fluctuations of residues V<sub>40</sub>-I<sub>45</sub>. For the I45T mutant,  
4 residues T<sub>43</sub>-T<sub>45</sub> in 80 % TFE and residues A<sub>42</sub>-I<sub>47</sub> in POPC mainly determine the FM. Thus,  
5 the ensemble of residues which collectively participate in the hinge motions is shifted towards  
6 the C-terminus in I45T (**Figure 4A**), which is consistent with the shift of hinge sites. The  
7 DynDom program characterizes all FMs as motions with >50% bending. Hinge residues which  
8 coordinate this bending show the highest contribution to these FMs (green stars in **Figure 4A**).  
9 The overlap between the FMs, which characterizes the similarity between two motions, reveals  
10 a significant difference between WT and I45T. FMs of either TMD in 80 % TFE and POPC are  
11 similar (**Figure 4A**, right panel). To visualize each peptide's FM, conformations are  
12 interpolated along the FM (**Figure 4B/C**). The FM of the WT helix in 80 % TFE and in POPC  
13 consists of a bending motion, promoting a pronounced upward movement of the  $\epsilon$ -sites (**Figure**  
14 **4B**). Surprisingly, such upward movement is not present in the I45T mutant. Top views on the  
15 interpolated conformations (**Figure 4C**) exhibit only minor differences in the bending direction  
16 between WT and I45T in 80 % TFE and in the POPC bilayer.

17 To summarize, observed alterations in H-bond dynamics by the I45T FAD mutation correlate  
18 with altered motion type and localization of hinge bending in TM-C. This motion induces an  
19 upward bending movement of the  $\epsilon$  cleavage site in WT which is not present in the I45T mutant.

20

## 1 Discussion

2 FAD mutations in the TM-C of the C99 TMD<sup>19</sup> mainly lead to changes in the total efficiency  
3 of  $\epsilon$ -cleavage, the preference for  $\epsilon$ 48 vs.  $\epsilon$ 49 sites, and the processivity of cleavage, thus altering  
4 A $\beta$  ratios.<sup>15,20,36</sup> Neither the S' pocket model of substrate binding<sup>23,33</sup> nor the stability of the  
5 helix at the cleavage sites<sup>28,31,33</sup>, its global shape fluctuations,<sup>26</sup> or the location of dynamic  
6 elements (e.g. hinges) in the TMD<sup>29</sup> offer a consistent explanation for these impacts of FAD  
7 mutations. The I45T mutation is a particular case as it strongly reduces  $\epsilon$ -efficiency<sup>20,21</sup> but does  
8 not significantly shift  $\epsilon$ -site preference.<sup>23</sup> At the same time, I45T increases the A $\beta$ 42/A $\beta$ 40  
9 ratio<sup>20,21,23</sup> which indicates pathway switching after initial  $\epsilon$ -cleavage.<sup>23</sup>

10 Here, we investigated the impact of the I45T FAD mutation on local and global backbone  
11 dynamics of the C99 TMD. Our amide H-bond stability profiles indicate that the weakly packed  
12 TM-N of C99 is more flexible than the more tightly packed TM-C, which harbors the cleavage  
13 sites. Normalized MSF profiles confirm below-average fluctuations around the  $\epsilon$  cleavage sites.  
14 Moreover, in addition to the known G<sub>37</sub>G<sub>38</sub> hinge,<sup>34</sup> our simulations confirm the occurrence of  
15 a previously described second flexible hinge located in TM-C.<sup>29</sup> The I45T FAD mutation alters  
16 H-bond stability around and upstream of the mutation site and, thereby, relocates and stiffens  
17 the hinge in TM-C.<sup>26,29</sup>

18 In general, our results obtained *in silico* are in good agreement with our experimental work.  
19 Differences between them are mainly seen in TM-N. Since this part is very flexible, differences  
20 may originate from: (1) difficulties to capture very rapidly exchanging amides associated with  
21 uncertainties in quantitative evaluation of the experimental data, (2) a less structured TM-N in  
22 the A28-55 peptides (relative to A26-55 peptides) used in the ETD-MS experiments, and/or (3)  
23 incomplete sampling of unfolded or slightly disordered regions in the simulations. Compared

1 to our ETD-MS measurements, NMR spectroscopy suggests slower amide exchange within  
2 TM-N and somewhat faster exchange within parts of TM-C. A potential source of this  
3 discrepancy may be either the formation of dimers at the concentrations used for the NMR  
4 measurements<sup>27</sup> and/or a less structured TM-N in the A28-55 peptides used in the ETD-MS  
5 experiments.

6 The higher flexibility of TM-N relative to TM-C is in conflict with recently reported H-bond  
7 strengths for the C99 TMD in LMPG micelles.<sup>42</sup> There, D/H fractionation factors  $\Phi$  were  
8 derived from  $k_{\text{exp,HDX}} / k_{\text{exp,DHX}}$  ratios. Generally, the  $\Phi$  value reports the isotopic preference in  
9 an H-bond, where the equilibrium enrichment of deuterium at the amide indicates weak H-  
10 bonds ( $\Phi > 1$ ). Cao et al. reported  $\Phi < 1$  in TM-N and  $\Phi > 1$  for some residues in TM-C,  
11 concluding that the C99 TMD has strong H-bonds in TM-N and weak H-bond for some residues  
12 (T43, V44, and T48) in TM-C.<sup>42</sup> Here, we show that  $k_{\text{exp,HDX}} / k_{\text{exp,DHX}}$  ratios determined in  
13 isotropic solution are close to 0.2 in overall MS-based amide exchange as well as in those site-  
14 specific NMR measurements where experimental error is sufficiently low. In addition, we  
15 challenge the interpretation of  $\Phi$  derived from the  $k_{\text{exp,HDX}} / k_{\text{exp,DHX}}$  ratios by Cao et al.<sup>42</sup> As  
16 detailed in the **Supplementary Discussion** online, the ratio  $k_{\text{exp,HDX}} / k_{\text{exp,DHX}}$  may not reflect  
17 the stability of an intrahelical amide-to-carbonyl H-bond. Rather, we propose that they reflect  
18 the stability of an amide-to-solvent H-bond which is determined by the chemical exchange rate  
19 constants  $k_{\text{ch}}$ . This is supported by measurements of  $k_{\text{exp,HDX}} / k_{\text{exp,DHX}}$  ratios by Cao et al. and  
20 ourselves, many of which were close to the average  $k_{\text{ch,HDX}} / k_{\text{ch,DHX}}$  ratio of 0.2.<sup>56</sup> Concerning  
21 reported weak H-bonds for residues T43, V44, T48 in TM-C it has to be noted, that conspicuous  
22 features of amide hydrogen D/H fractionation factors of threonine residues have been reported  
23 previously.<sup>54,64</sup> It was shown that electrostatic stabilization of cooperative H-bonds, emanating  
24 from the amide and the side chain of a threonine dramatically decreases equilibrium  
25 fractionation factors. The dielectric environment influences stiffness of amide vibrational



1 modes and pKa differences between donor and acceptor and thus, the chemical rate constants,  
2 in an isotope specific way. Therefore, the weak amide-to-solvent H-bonds reported for T43,  
3 V44 and T48 following the procedure given in Cao et al. is thus in line with strong intrahelical  
4 H-bonds and back-bonding from threonine side chains.

5 What is the reason for the increased H-Bond stability in the TM-C of the I45T mutation relative  
6 to WT? Our MD simulations revealed an additional H-bond between the hydroxyl group of the  
7 T45 side chain and the backbone carbonyl oxygen of I41. Similar back-bonding interactions at  
8 T43 and T48<sup>26,29</sup> had previously been shown to influence the extent and direction of helix  
9 bending of the C99 TMD.<sup>26</sup> Mutating T43 or T48 alters  $\epsilon$ -efficiency as well as A $\beta$ 42/A $\beta$ 40  
10 ratios by shifting  $\epsilon$ -site preference.<sup>15,20,21,36</sup> By introducing an additional H-bond, the I45T  
11 mutation strengthens the network of H-bonds in TM-C.

12 Bending fluctuations in the APP TMD are mainly controlled by a hinge located around  
13 G<sub>37</sub>G<sub>38</sub><sup>26,29,34</sup> which determines the orientation of TM-C, harboring the cleavage sites, relative  
14 to TM-N, harboring putative binding motifs.<sup>26,27,29</sup> The I45T mutation caused only minor  
15 variations of these fluctuations, which does not explain the severely reduced  $\epsilon$ -efficiency.<sup>20,21</sup>  
16 Recently, we identified an additional flexible region around T<sub>43</sub>-I<sub>45</sub>, which can act as an  
17 additional flexible joint, controlling  $\epsilon$ -site mobility relative to the center of the helix.<sup>29</sup> Here,  
18 we found that this hinge controls the backbone motion that correlates maximally to the  
19 open/close dynamics of those H-bonds affected by the I45T mutation. Crucially, an upward  
20 movement of the  $\epsilon$ -sites could be observed in the WT but was absent in I45T. The lack of this  
21 upward movement might explain reduced  $\epsilon$ -efficiency, as it may adjust the height of the  $\epsilon$ -  
22 cleavage sites relative to the catalytic aspartates of presenilin.

23 The additional H-bond contributed by the T45 side chain might also explain pathway switching  
24 observed in the I45T mutant.<sup>20,23</sup> As this side chain stabilizes the helix around the  $\zeta$ - and  $\gamma$ -

1 cleavage sites, back-bonding might inhibit unfolding within the catalytic cleft of presenilin and  
2 thus limit its access to the  $\zeta$ -46 scissile bond. As a result, presenilin may switch from the  $\epsilon$ 49-  
3  $\zeta$ 46- $\gamma$ 43 pathway to the  $\zeta$ 45- $\gamma$ 42 pathway which explains the near complete lack of A $\beta$ 43.<sup>20</sup> We  
4 note that this is rather speculative, as the dynamics of the A $\beta$ 49 cleavage product in the catalytic  
5 site of  $\gamma$ -secretase is currently unknown and subject to future investigations. However, this  
6 model is supported by experimental results, which showed increased stability at the cleavage  
7 site to decrease cleavage efficiency in  $\gamma$ -secretase<sup>33</sup> and even inhibit cleavage in rhomboids.<sup>65</sup>

8 In sum, the I45T mutation strengthens the H-bond network in TM-C and changes the position  
9 and dynamics of a flexible hinge that is located one turn upstream of the  $\epsilon$ -sites. The combined  
10 effect may alter the access of both  $\epsilon$ -sites by the catalytic Asp residues of the enzyme, thus  
11 providing a rationale for reduced  $\epsilon$ -efficiency without affecting  $\epsilon$ -site preference.

## 1 **Materials and Methods**

2 **Peptide Sequences.** In this study, we used short model peptides which either consisted of  
3 residues 26-55 of C99 (A26-55) or residues 28-55 of C99 (A28-55) with an additional KK tag  
4 at the terminus (**Table 1**). The A26-55 was used for overall exchange and NMR experiments  
5 as well as MD simulations. For ETD measurements, we had to use A28-55 in order to achieve  
6 proper fragmentation. Similar C99 TMD peptides were shown to be good substrates for  $\gamma$ -  
7 secretase.<sup>31,43</sup> For more native conditions, we blocked both terminal ends by acetylation (N-Ter)  
8 and amidation (C-Ter).

| Peptide | Mutation | Sequence                                                            |
|---------|----------|---------------------------------------------------------------------|
| A26-55  | WT       | Ac-SNKGAIIGLMVGGVVIATVIVITLVMLKKK-NH <sub>2</sub>                   |
|         | I45T     | Ac-SNKGAIIGLMVGLVVIATV <b>T</b> VITLVMLKKK-NH <sub>2</sub>          |
| A28-55  | WT       | Ac- <b>KKK</b> GAIIGLMVGGVVIATVIVITLVMLKKK-NH <sub>2</sub>          |
|         | I45T     | Ac- <b>KKK</b> GAIIGLMVGLVVIATV <b>T</b> VITLVMLKKK-NH <sub>2</sub> |

9  
10 **Peptide Synthesis.** Peptides were synthesized by Fmoc chemistry by PSL, Heidelberg,  
11 Germany and purified to >90 % purity as judged by mass spectrometry. All other chemicals  
12 were purchased from Sigma-Aldrich Co. (St. Louis, Missouri, USA).

13  
14 **Deuterium Hydrogen Exchange by MS/MS.** All mass spectrometric experiments were  
15 performed on a Synapt G2 HDMS (Waters Co., Milford, MA). Samples were injected from an  
16 100  $\mu$ l Hamilton gas-tight syringe via a Harvard Apparatus 11plus with a flow rate of 5  $\mu$ l/min.  
17 Spectra were acquired in positive-ion mode with one scan per second and 0.1 s interscan time.

1 Solutions of deuterated peptide (100  $\mu$ M in 80 % (v/v) d1-trifluoroethanol (d1-TFE) in 2 mM  
2 ND<sub>4</sub>-acetate) were diluted 1:20 with protonated solvent (80 % (v/v) TFE in 2 mM NH<sub>4</sub>-acetate,  
3 pH 5.0) to a final peptide concentration of 5  $\mu$ M and incubated at a temperature of 20.0°C in a  
4 thermal cycler (Eppendorf, Germany). Incubation times were 0, 1, 2, 5, 10, 20, 30, 40, 50 min,  
5 and 1, 2, 3, 4, 6, 8, 12, 24, 48, 72 h. Exchange reactions were quenched by cooling the samples  
6 on ice and lowering the pH to 2.5 by adding 0.5 % (v/v) formic acid. Mass/charge ratios were  
7 recorded and evaluated as previously described,<sup>48,49</sup> including a correction for the dilution  
8 factor. For electron transfer dissociation (ETD) we used 1,4- dicyanobenzene as reagent on 5+  
9 charged peptides, preselected via MS/MS. Fragmentation of peptides was performed as  
10 described<sup>35</sup>. Briefly, ETD MS/MS scans were accumulated over 10 min scan time, smoothed  
11 (Savitzky-Golay, 2 x 4 channels), and centered (80% centroid top, heights, 3 channels). ETD-  
12 measurements were performed after 13 different incubation periods (from 1 min to 3 d) where  
13 exchange took place at pH 5.0. Shorter (0.1 min, 0.5 min) and longer (5 d, 7 d) incubation  
14 periods were simulated by lowering the pH to 4.0 or elevating pH to 6.45, respectively, using  
15 matched periods. The differences to pH 5.0 were considered when calculating the  
16 corresponding rate constants. We note that base-catalyzed exchange is responsible for at least  
17 95 % of total deuterium exchange at  $\geq$ pH 4.0. The resulting ETD c and z fragment spectra were  
18 evaluated using a semi-automated procedure (ETD FRAGMENT ANALYZER module of  
19 MassMap\_2017-11-16\_LDK Software, MassMap GmbH & Co. KG, Freising). The free  
20 energies  $\Delta G$  required for H-bond opening were calculated from  $k_{exp,DHX}$  and  $k_{ch}$  based on  
21 **equation (1)** based on Linderstrom-Lang theory, assuming EX2 conditions and a  
22 predominantly folded state.<sup>52</sup>

23

$$\Delta G = -RT \ln \left( \frac{k_{exp,DHX}}{k_{ch} - k_{exp,DHX}} \right) \quad (1)$$

1 where  $k_{ch}$  represents the sequence specific chemical rate constants that were calculated by  
2 <http://landing.foxchase.org/research/labs/roder/sphere/> (under the set conditions: D-to-H-  
3 exchange, reduced Cys, pH =5.0, T = 20.0°C).

4 It should be noted, that the  $\Delta G$  values obtained with this procedure are an upper estimate of the  
5 true values since (i) the molarity of water in 80% (v/v) TFE solvent is only 20% of the bulk  
6 molarity used for the determination of the reference chemical exchange rates  $k_{ch}$ , and (ii) the  
7 hydration of residues in the hydrophobic core of a TMD is possibly reduced relative to bulk.  
8 Both factors likely reduce the chemical exchange rate in our experiments. In addition, TFE  
9 might have an impact on the auto-ionization constant of water and the chemical exchange rate  
10 constants.<sup>35</sup>

11 A detailed outline of the method is published elsewhere.<sup>53</sup> Due to the 5 % of deuterated solution  
12 in the the DHX-ETD assay, we used the following fit-equation **(2)** to calculate  $k_{exp,DHX}$ .

$$13 \quad y = 0.95 * e^{-k_{exp,DHX}t} + 0.05 \quad (2)$$

14 The extent of hydrogen scrambling could not be calculated with the ammonia loss method<sup>66</sup>  
15 due to the blocked N-termini. However, previous experiments with similar peptides showed  
16 scrambling to be negligible under our conditions.<sup>59</sup> The absence of significant hydrogen  
17 scrambling is also indicated by the successful reconstruction of global exchange kinetics from  
18 the ETD data (**Supplementary Figure 2D** online).

19

## 20 **Molecular Dynamics Simulations.**

21 We performed molecular dynamics (MD) simulation of the A26-55 WT peptide and its I45T  
22 mutant (**Table 1**). Because no conformations were available for the investigated peptides, we

1 developed a stochastic sampling protocol to generate a set of initial starting conformations (see  
2 **Supplementary Methods** online).

3 For TFE/water we performed a total of 78 simulations of 200 ns length using cluster centroids  
4 determined by affinity propagation clustering<sup>67</sup> as input conformations. Settings as described  
5 in Pester et al.<sup>27</sup> have been used for each simulation. In brief, each conformation was placed in  
6 a rectangular solvent box, containing 80 % TFE and 20 %TIP3 (v/v). Equilibration was carried  
7 out in multiple steps by reducing harmonic restraints over a total of 1.2 ns. Production runs  
8 were performed in a NPT ensemble ( $T = 293$  K,  $p = 0.1$  MPa) using NAMD 2.11<sup>68</sup> and the  
9 CHARMM36 force field.<sup>69</sup> An aggregated simulation time of 15.6  $\mu$ s was collected for each  
10 peptide. The last 150 ns of each simulation have been subjected to analysis, leading to an  
11 effective aggregated analysis over 11.7  $\mu$ s for each peptide. Frames have been recorded every  
12 10 ps.

13 For simulations in POPC, a centroid conformations as obtained by hierarchical clustering has  
14 been placed in a POPC bilayer, consisting of 128 POPC lipids, using protocols as provided by  
15 CHARMM-GUI<sup>70</sup>. Simulations of 2.5  $\mu$ s ( $T=303.15$  K,  $p = 0.1$  MPa) have been performed,  
16 using NAMD 2.12<sup>68</sup>, the CHARMM36 force field<sup>69</sup> and settings as provided by CHARMM-  
17 GUI. Frames have been recorded every 10 ps. Only the last 1.5  $\mu$ s of each trajectory have been  
18 subjected to analysis.

19

20 **Analysis of MD Simulations.** To validate the MD simulations, DHX kinetics were calculated  
21 from the MD simulations as described in Högel et. al.<sup>59</sup> In order to account for non-deuterated  
22 residues in the experiment, the fit function has been modified as shown in **equation (3)**.

$$D(t) = \sum_{i=1}^{n_{res}} (a * e^{-k_{i,DHX} * f * (t+t_0)} + c) \quad (3)$$

1 To account for 5% of non-deuterated peptide in the experiment, the amplitude (a) is set to 0.95  
2 and a baseline (c) of 0.05 is added to the equation. In addition to the original protocol, we added  
3 a second fitting parameter  $t_0$  which accounts for time delays in the experiment. The quality of  
4 the MD-derived prediction of exchange kinetics was assessed by the normalized mean-squared  
5 deviation ( $\chi^2$ ) of the averaged D(t) values with respect to the experimental averages.

6 Occupancies of closed H-bonds have been computed for the types  $\alpha$ ,  $3_{10}$  or helix ( $\alpha$  or  $3_{10}$   
7 closed). Thereby, a H-bond was considered to be closed if the  $O \cdots H$  distance was  $< 0.26$  nm  
8 and the  $O \cdots H - N$  angle was in the range  $180^\circ \pm 60^\circ$ .

9 Packing scores  $S_i$  measure the contacts of the carbonyl oxygen of residue  $i$  to all other atoms  $j$   
10 and have been computed as described in <sup>71</sup>.

11 Backbone mean-squared fluctuations (MSF,  $C\alpha$  atoms of residues G29-L52) were calculated  
12 for non-overlapping blocks as used for block-averaging. The block mean structure was  
13 calculated iteratively<sup>72</sup>. Normalization was done as described in Götz and Scharnagl (2018).<sup>71</sup>

14 To access collective large scale motions of the helix backbone, the bending  $\Theta$  and swivel  $\Phi$   
15 angles between a helical segment in TM-N and TM-C, respectively, have been computed as in  
16 Götz and Scharnagl (2018).<sup>29</sup> The segment in TM-N covered residue I31-M35, while the  
17 segment in TM-C covered residues I47-M51.

18 Hinge bending and twisting motions in the TM-helix have been analysed by the Dyndom  
19 program<sup>62</sup> as described in Götz and Scharnagl (2018).<sup>29</sup> In contrast to the original protocol,  
20 snapshots every 100 ps have been subjected to analysis.

1 Functional mode analysis was performed by the PLS-FMA program which uses a partial least-  
2 squares (PLS) model and was kindly provided by Bert de Groot<sup>63</sup>. Helix H-bond occupancies  
3 ( $\alpha$  or  $3_{10}$  closed) for residues V44-I47 have been summed up and their time series has been used  
4 as functional order parameter for the model. Heavy backbone atoms of residues G29-L52 have  
5 been used for the correlation analysis. The first half of the trajectory has been used for model  
6 training, while the second half was used for cross-validation of the PLS-FMA model. The  
7 required number of PLS components was determined from the convergence of the Pearson  
8 correlation coefficient between data and model ( $R_m$ ) as a function of the number of components  
9 (**Supplementary Fig. S10** online). Structural changes, causing substantial variation in the order  
10 parameters were characterized by the ensemble-weighted, maximally correlated motions  
11 (ewMCM). For visualization, trajectories along the ewMCM vectors interpolating from low to  
12 high value of occupancies were used. Characterization of the ewMCM was done by DynDom,  
13 subjecting the conformations with the highest and lowest extend along ewMCM to analysis.  
14 Similarities of ewMCM vectors were quantified by the inner product of ewMCM vectors.

15 If not mentioned otherwise, all analyses used custom-built Python scripts based upon the  
16 MDtraj library.<sup>73</sup> Visuals have been generated by VMD 1.9.2<sup>74</sup>

17

18 **Statistical Evaluation of MD Results.** Mean values and 95% confidence intervals have been  
19 obtained by bias-corrected and accelerated bootstrap resampling<sup>75</sup> of block averages. A block  
20 size of 30 ns has been chosen to be  $> 2\tau$ , with  $\tau$  representing the autocorrelation function's first  
21 zero passage time (**Supplementary Fig. S11** online). Error propagation has been performed by  
22 Monte-Carlo sampling. For resampling, values for each residue in a block have been considered  
23 to be dependent and 10000 sample were generated



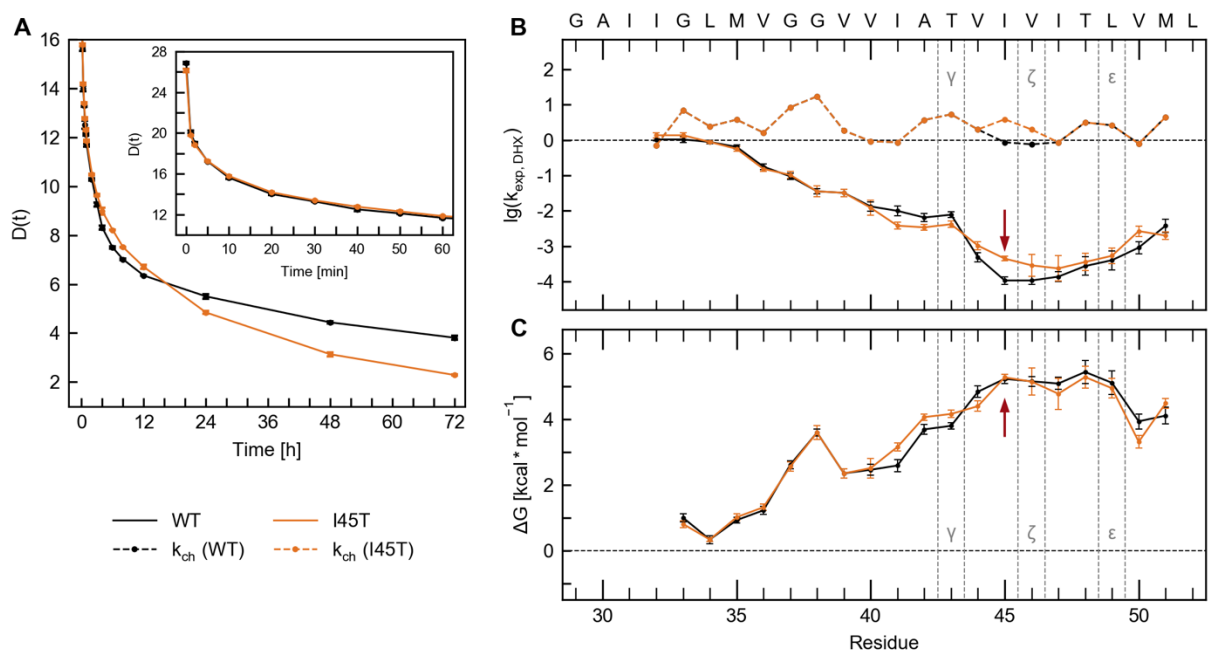

1

2 **Figure 1.** Deuterium-hydrogen exchange kinetics and H-bond stabilities determined by ESI-  
3 TOF MS. (A) Overall amide DHX kinetics of A26-55. The number of remaining deuterons  
4 plotted as a function of time for the initial 60 min (inset) and the complete 72 h of incubation  
5 (mean values,  $n \geq 3$ , SEM smaller than the symbols). (B) DHX rate constants  $k_{\text{exp,DHX}}$  [1/min]  
6 of individual amide deuterons from ETD measurements ( $n \geq 3$ , mean values  $\pm$  SE). The dashed  
7 lines correspond to the calculated chemical amide exchange rate constants  $k_{\text{ch}}$  [1/min]. (C)  
8 Strength ( $\Delta G$ ) of intrahelical amide H-bonds based on calculated exchange rate constants.  
9 Calculation of  $\Delta G$  was not possible for residues G29-I32 at the N-terminus where  $k_{\text{ch}}$  exceeded  
10 the experimental exchange rate constants. Error bars correspond to standard confidence  
11 intervals calculated from the standard errors of  $k_{\text{exp,DHX}}$ .

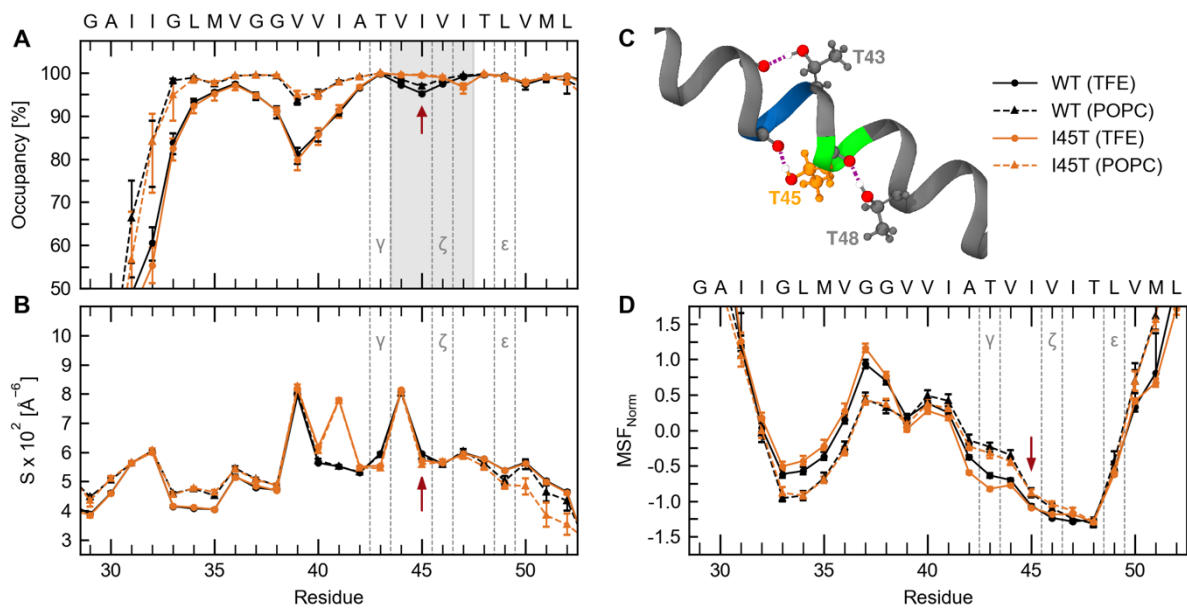

1  
2 **Figure 2.** Local dynamics in 80 % TFE and a POPC bilayer from MD simulations. (A)  
3 Occupancies of intramolecular H-bonds between the amide hydrogen at position  $i$  and carbonyl  
4 oxygens at position  $i-3$  ( $3_{10}$  helix) or  $i-4$  ( $\alpha$  helix). Residues covered by the grey area showed  
5 significant differences between WT and I45T and were used as input for FMA. (B) Packing  
6 scores  $S_i$  along the TMD. (C) Visual representation of threonine back-bonding in the I45T  
7 mutant. Red spheres represent oxygen atoms and white spheres indicate hydrogen atoms  
8 involved in H-bonding. Green color indicates  $\zeta$ -cleavage sites while blue indicates  $\gamma$ -cleavage  
9 sites. Dashed violet lines represent H-bonds. (D) Mean-squared fluctuations normalized to zero  
10 mean and unit variance. Red arrows point to the I45T mutation site. Values represent means  
11 with 95% confidence intervals from bootstrap resampling.

12

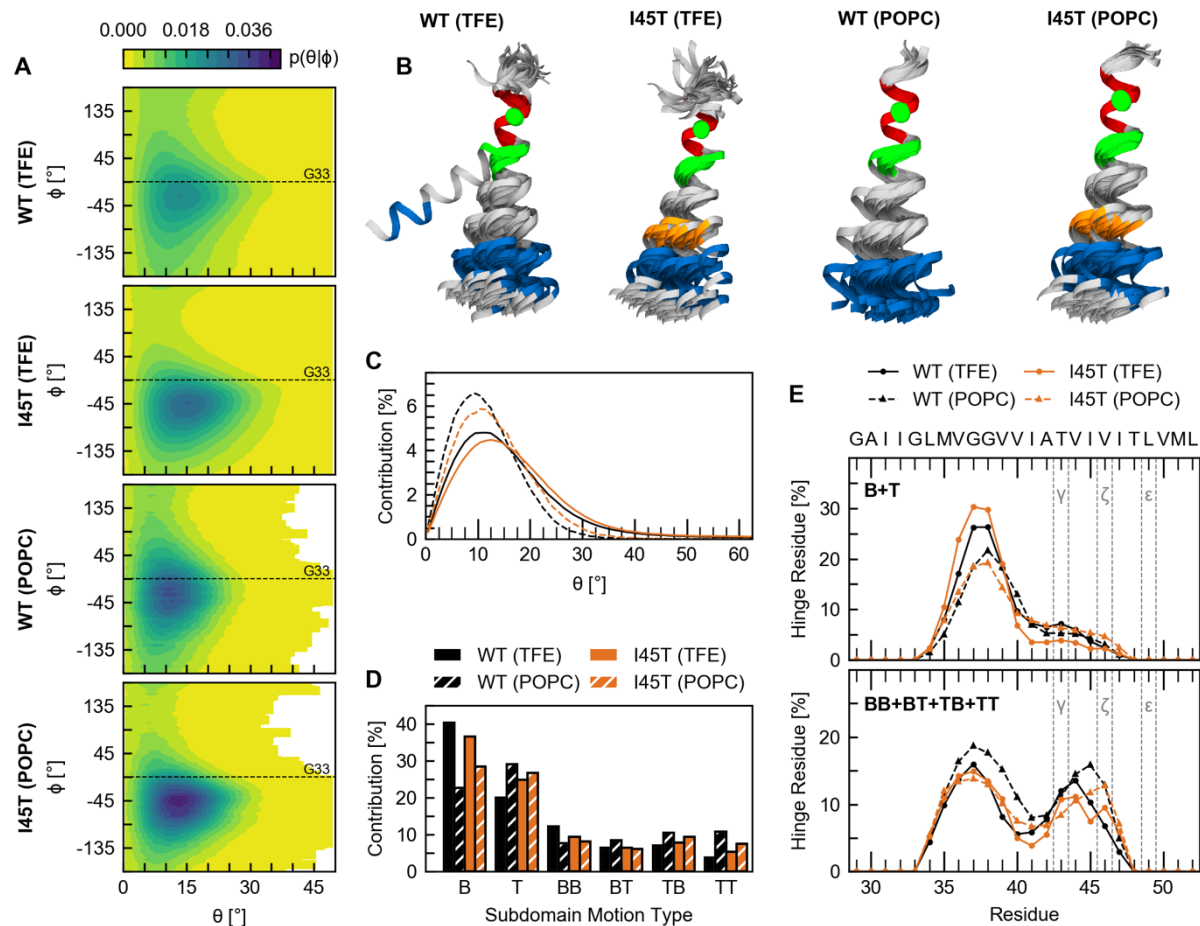

1

2 **Figure 3.** Collective TM-helix motions. (A) Bending ( $\theta$ ) and swivel ( $\Phi$ ) angles, which  
 3 characterize the orientation of the  $\epsilon$ -sites-carrying TM-C helix segment I47-M51 in relation to  
 4 the TM-N segment I31-M35. (B) Representative conformations (overlaid at I31-M35) as  
 5 determined by K-means clustering of  $\theta$  and  $\Phi$  angles (blue, TM-C segment I47-M51; red, TM-  
 6 N segment I31-M35; orange, I45T mutation; green, G37 and G38; green sphere, C $_{\alpha}$  atom of  
 7 G33). (C) Probability distributions of bending angles. (D) Probability of hinge motion types.  
 8 Motions coordinated by a single hinge are referred to as type B and T, respectively. Motions  
 9 around a pair of hinges are characterized by combinations of bending and twisting (BB, BT,  
 10 TB, TT). (E) Probability by which a residue is identified as a hinge site in a single (B+T) and  
 11 double-hinge (BB+BT+TB+TT) motion.

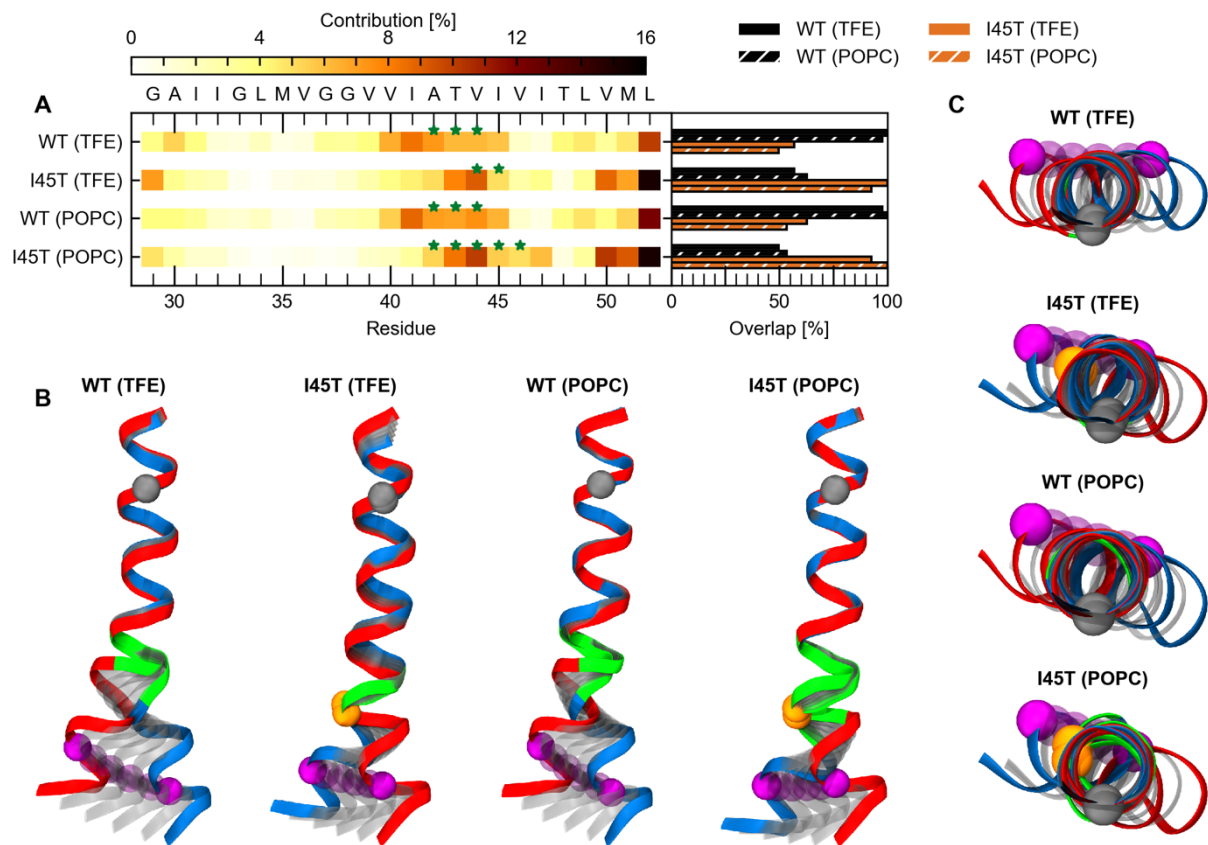

1  
2 **Figure 4.** Functional model analysis. (A) Contribution of residues to the motion correlated  
3 maximally with occupancy variations of intrahelical amide H-bonds spanning residues V44 -  
4 I47. Green stars indicate residues that act as hinges. Overlap (inner product) between the  
5 individual ewMCM vectors is shown in the right panel. (B) Visualization of conformations as  
6 generated by interpolation along the ewMCM between maximum (red) and minimum (blue)  
7 extends. Structures have been overlaid to residues I31 – M35. Grey spheres represent the  $C_{\alpha}$   
8 atom of G33, orange spheres the  $C_{\alpha}$  atom of T45 and purple spheres the  $C_{\alpha}$  atom of L49.  
9 Residues classified as hinge residues (see A) are highlighted in green. (C) Top view on  
10 visualizations of the ewMCM as shown in B.

## 1 **Acknowledgements**

2 This work was supported by the Deutsche Forschungsgemeinschaft in the framework of the  
3 DFG research unit FOR2290 through grants LA699/20-1, SCHA630/4-1 and LU835/12-1 as  
4 well as by and the Centre of Integrative Protein Science Munich (CIPSM). The ETD  
5 FRAGMENT ANALYZER module of MassMap was kindly provided by Manfred Wozny  
6 (MassMap GmbH & Co. KG, Freising). The lsNMR experiments in this work were funded by  
7 the Helmholtz Programme BioInterfaces in Technology and Medicine (BIFTM) of the  
8 Karlsruhe Institute of Technology (KIT) and the DFG instrumental facility Pro<sup>2</sup>NMR.  
9 Computing resources were provided by the Leibniz Supercomputing Centre (LRZ) through  
10 grants ta511 (Linux Cluster) and pr92so (SuperMUC) and by the Gauss Centre for  
11 Supercomputing (GCS) through grants pr48ko (SuperMUC, LRZ). We want to thank Harald  
12 Steiner for his comments on the manuscript.

13

## 14 **Author Contributions**

15 AG did MD simulations, analyzed the data and made the figures. PH performed mass-  
16 spectrometry, analyzed the data and contributed supplementary figures and tables with  
17 assistance from IH. MS performed NMR experiments, analyzed the data and contributed  
18 supplementary figures. CS contributed theoretical thoughts about the isotope effect. DL, CS,  
19 CMG and BL designed and supervised the project. AG and PH wrote the manuscript with  
20 assistance from CS and DL. All authors have commented and given approval to the final version  
21 of the manuscript.

22

## 1 **Additional Information**

2 **Supporting Information:** Supporting information contains additional discussion and methods,  
3 Tables S1 and S2, Figures S1-S11.

4 **Competing Interests:** The authors declare no competing financial interests.

5

## 6 **Abbreviations**

7 A $\beta$ , Amyloid  $\beta$  fragment; AD, Alzheimer's disease; AICD, Amyloid intracellular domain; APP,  
8 Amyloid Precursor Protein; CD, circular dichroism; C99, 99 amino acid long fragment of the  
9 Amyloid Precursor Protein; DHX, deuterium hydrogen exchange; ETD, electron transfer  
10 dissociation; ewMCM, ensemble weighed maximally correlated motion; FAD, familial  
11 Alzheimer's disease; FM, functional mode; FMA, functional mode analysis; H-bond, hydrogen  
12 bond; HDX, hydrogen deuterium exchange; I45T, I45T FAD mutation of C99; LMPG, lyso-  
13 myristoylphosphatidylglycerol; MD, molecular dynamics; MS, mass-spectrometry; MSF,  
14 mean-squared fluctuation; NMR, Nuclear magnetic resonance spectroscopy; PLS, partial least  
15 squares; POPC, 1-palmitoyl-2-oleoylphosphatidylcholine; TFE, 2,2,2-trifluoroethanol; TM,  
16 transmembrane; TMD, transmembrane domain; TM-C, C-terminal part of the amyloid  
17 precursor protein transmembrane domain; TM-N, N-terminal part of the amyloid precursor  
18 protein transmembrane domain; WT, wild-type;

## 1 **References**

- 2 1. Haapasalo, A. & Kovacs, D. M. The many substrates of presenilin/ $\gamma$ -secretase. *J.*  
3 *Alzheimers. Dis.* **25**, 3–28 (2011).
- 4 2. Beel, A. J. & Sanders, C. R. Substrate specificity of gamma-secretase and other  
5 intramembrane proteases. *Cell. Mol. Life Sci.* **65**, 1311–34 (2008).
- 6 3. Haass, C., Kaether, C., Thinakaran, G. & Sisodia, S. Trafficking and Proteolytic  
7 Processing of APP. *Cold Spring Harb. Perspect. Med.* **2**, a006270–a006270 (2012).
- 8 4. Kaether, C., Haass, C. & Steiner, H. Assembly, trafficking and function of  $\gamma$ -secretase.  
9 *Neurodegener. Dis.* **3**, 275–283 (2006).
- 10 5. Lichtenthaler, S. F., Haass, C. & Steiner, H. Regulated intramembrane proteolysis -  
11 lessons from amyloid precursor protein processing. *J. Neurochem.* **117**, 779–796 (2011).
- 12 6. Fukumori, A., Fluhrer, R., Steiner, H. & Haass, C. Three-Amino Acid Spacing of  
13 Presenilin Endoproteolysis Suggests a General Stepwise Cleavage of  $\gamma$ -Secretase-  
14 Mediated Intramembrane Proteolysis. *J. Neurosci.* **30**, 7853–7862 (2010).
- 15 7. Matsumura, N. *et al.*  $\gamma$ -Secretase Associated with Lipid Rafts. *J. Biol. Chem.* **289**, 5109–  
16 5121 (2014).
- 17 8. Olsson, F. *et al.* Characterization of intermediate steps in amyloid beta (A $\beta$ ) production  
18 under near-native conditions. *J. Biol. Chem.* **289**, 1540–50 (2014).
- 19 9. Qi-Takahara, Y. *et al.* Longer Forms of Amyloid Protein: Implications for the  
20 Mechanism of Intramembrane Cleavage by  $\gamma$ -Secretase. *J. Neurosci.* **25**, 436–445 (2005).

- 1 10. Quintero-Monzon, O. *et al.* Dissociation between the Processivity and Total Activity of  
2  $\gamma$ -Secretase: Implications for the Mechanism of Alzheimer's Disease-Causing Presenilin  
3 Mutations. *Biochemistry* **50**, 9023–9035 (2011).
- 4 11. Takami, M. *et al.*  $\gamma$ -Secretase: Successive Tripeptide and Tetrapeptide Release from the  
5 Transmembrane Domain of  $\beta$ -Carboxyl Terminal Fragment. *J. Neurosci.* **29**, 13042–52  
6 (2009).
- 7 12. Saito, T., Matsuba, Y., Yamazaki, N., Hashimoto, S. & Saido, T. C. Calpain Activation  
8 in Alzheimer's Model Mice Is an Artifact of APP and Presenilin Overexpression. *J.*  
9 *Neurosci.* **36**, 9933–9936 (2016).
- 10 13. Sandebring, A., Welander, H., Winblad, B., Graff, C. & Tjernberg, L. O. The Pathogenic  
11 A $\beta$ 43 Is Enriched in Familial and Sporadic Alzheimer Disease. *PLoS One* **8**, e55847  
12 (2013).
- 13 14. Selkoe, D. J. & Hardy, J. The amyloid hypothesis of Alzheimer's disease at 25 years.  
14 *EMBO Mol. Med.* **8**, 595–608 (2016).
- 15 15. Dimitrov, M. *et al.* Alzheimer's disease mutations in APP but not  $\gamma$ -secretase modulators  
16 affect epsilon-cleavage-dependent AICD production. *Nat. Commun.* **4**, 2246 (2013).
- 17 16. Kakuda, N. *et al.* Equimolar Production of Amyloid  $\beta$ -Protein and Amyloid Precursor  
18 Protein Intracellular Domain from  $\beta$ -Carboxyl-terminal Fragment by  $\gamma$ -Secretase. *J. Biol.*  
19 *Chem.* **281**, 14776–14786 (2006).
- 20 17. Page, R. C. *et al.*  $\beta$ -Amyloid Precursor Protein Mutants Respond to  $\gamma$ -Secretase  
21 Modulators. *J. Biol. Chem.* **285**, 17798–17810 (2010).



- 1 18. Weggen, S. & Behr, D. Molecular consequences of amyloid precursor protein and  
2 presenilin mutations causing autosomal-dominant Alzheimer's disease. *Alzheimers. Res.*  
3 *Ther.* **4**, 9 (2012).
- 4 19. Alzforum. Mutations Database. (2018). Available at:  
5 <https://www.alzforum.org/mutations>. (Accessed: 9th January 2018)
- 6 20. Chávez-Gutiérrez, L. *et al.* The mechanism of  $\gamma$ -Secretase dysfunction in familial  
7 Alzheimer disease. *EMBO J.* **31**, 2261–2274 (2012).
- 8 21. Xu, T.-H. *et al.* Alzheimer's disease-associated mutations increase amyloid precursor  
9 protein resistance to  $\gamma$ -secretase cleavage and the A $\beta$ 42/A $\beta$ 40 ratio. *Cell Discov.* **2**, 16026  
10 (2016).
- 11 22. Sato, T. *et al.* Potential Link between Amyloid  $\beta$ -Protein 42 and C-terminal Fragment  
12 49-99 of  $\beta$ -Amyloid Precursor Protein. *J. Biol. Chem.* **278**, 24294–24301 (2003).
- 13 23. Bolduc, D. M., Montagna, D. R., Seghers, M. C., Wolfe, M. S. & Selkoe, D. J. The  
14 amyloid-beta forming tripeptide cleavage mechanism of  $\gamma$ -secretase. *Elife* **5**, 1–4 (2016).
- 15 24. Dominguez, L., Foster, L., Straub, J. E. & Thirumalai, D. Impact of membrane lipid  
16 composition on the structure and stability of the transmembrane domain of amyloid  
17 precursor protein. *Proc. Natl. Acad. Sci.* **113**, E5281–E5287 (2016).
- 18 25. Pester, O., Götz, A., Multhaup, G., Scharnagl, C. & Langosch, D. The Cleavage Domain  
19 of the Amyloid Precursor Protein Transmembrane Helix Does Not Exhibit Above-  
20 Average Backbone Dynamics. *ChemBioChem* **14**, 1943–1948 (2013).
- 21 26. Scharnagl, C. *et al.* Side-Chain to Main-Chain Hydrogen Bonding Controls the Intrinsic

- 1 Backbone Dynamics of the Amyloid Precursor Protein Transmembrane Helix. *Biophys.*  
2 *J.* **106**, 1318–1326 (2014).
- 3 27. Pester, O. *et al.* The Backbone Dynamics of the Amyloid Precursor Protein  
4 Transmembrane Helix Provides a Rationale for the Sequential Cleavage Mechanism of  
5  $\gamma$ -Secretase. *J. Am. Chem. Soc.* **135**, 1317–1329 (2013).
- 6 28. Sato, T. *et al.* A helix-to-coil transition at the  $\epsilon$ -cut site in the transmembrane dimer of  
7 the amyloid precursor protein is required for proteolysis. *Proc. Natl. Acad. Sci.* **106**,  
8 1421–1426 (2009).
- 9 29. Götz, A. & Scharnagl, C. Dissecting conformational changes in APP's transmembrane  
10 domain linked to  $\epsilon$ -efficiency in familial Alzheimer's disease. *PLoS One* **13**, e0200077  
11 (2018).
- 12 30. Strisovsky, K. Why cells need intramembrane proteases - a mechanistic perspective.  
13 *FEBS J.* **283**, 1837–1845 (2016).
- 14 31. Chen, W. *et al.* Familial Alzheimer's mutations within APPTM increase A $\beta$ 42  
15 production by enhancing accessibility of  $\epsilon$ -cleavage site. *Nat. Commun.* **5**, 3037 (2014).
- 16 32. Lu, J.-X., Yau, W.-M. & Tycko, R. Evidence from Solid-State NMR for Nonhelical  
17 Conformations in the Transmembrane Domain of the Amyloid Precursor Protein.  
18 *Biophys. J.* **100**, 711–719 (2011).
- 19 33. Fernandez, M. A. *et al.* Transmembrane Substrate Determinants for  $\gamma$ -Secretase  
20 Processing of APP CTF $\beta$ . *Biochemistry* **55**, 5675–5688 (2016).
- 21 34. Barrett, P. J. *et al.* The Amyloid Precursor Protein Has a Flexible Transmembrane

- 1 Domain and Binds Cholesterol. *Science* (80-. ). **336**, 1168–1171 (2012).
- 2 35. Stelzer, W., Scharnagl, C., Leurs, U., Rand, K. D. & Langosch, D. The Impact of the  
3 ‘Austrian’ Mutation of the Amyloid Precursor Protein Transmembrane Helix is  
4 Communicated to the Hinge Region. *ChemistrySelect* **1**, 4408–4412 (2016).
- 5 36. Oestereich, F. *et al.* Impact of Amyloid Precursor Protein Hydrophilic Transmembrane  
6 Residues on Amyloid-Beta Generation. *Biochemistry* **54**, 2777–2784 (2015).
- 7 37. Ma, B. & Nussinov, R. Enzyme dynamics point to stepwise conformational selection in  
8 catalysis. *Curr. Opin. Chem. Biol.* **14**, 652–9 (2010).
- 9 38. Agarwal, P. K., Doucet, N., Chennubhotla, C., Ramanathan, A. & Narayanan, C. in 273–  
10 297 (2016). doi:10.1016/bs.mie.2016.05.023
- 11 39. Miyashita, N., Straub, J. E. & Thirumalai, D. Structures of  $\beta$ -Amyloid Peptide 1–40,  
12 1–42, and 1–55—the 672–726 Fragment of APP—in a Membrane Environment with  
13 Implications for Interactions with  $\gamma$ -Secretase. *J. Am. Chem. Soc.* **131**, 17843–17852  
14 (2009).
- 15 40. Beel, A. J. *et al.* Structural Studies of the Transmembrane C-Terminal Domain of the  
16 Amyloid Precursor Protein (APP): Does APP Function as a Cholesterol Sensor? † ‡.  
17 *Biochemistry* **47**, 9428–9446 (2008).
- 18 41. Dominguez, L., Meredith, S. C., Straub, J. E. & Thirumalai, D. Transmembrane  
19 Fragment Structures of Amyloid Precursor Protein Depend on Membrane Surface  
20 Curvature. *J. Am. Chem. Soc.* **136**, 854–857 (2014).
- 21 42. Cao, Z., Hutchison, J. M., Sanders, C. R. & Bowie, J. U. Backbone Hydrogen Bond

- 1 Strengths Can Vary Widely in Transmembrane Helices. *J. Am. Chem. Soc.* **139**, 10742–  
2 10749 (2017).
- 3 43. Yin, Y. I. *et al.*  $\gamma$ -Secretase Substrate Concentration Modulates the A $\beta$ 42/A $\beta$ 40 Ratio. *J.*  
4 *Biol. Chem.* **282**, 23639–23644 (2007).
- 5 44. Sato, C., Morohashi, Y., Tomita, T. & Iwatsubo, T. Structure of the catalytic pore of  
6 gamma-secretase probed by the accessibility of substituted cysteines. *J. Neurosci.* **26**,  
7 12081–8 (2006).
- 8 45. Schutz, C. N. & Warshel, A. What are the dielectric ‘constants’ of proteins and how to  
9 validate electrostatic models? *Proteins: Structure, Function and Genetics* **44**, 400–417  
10 (2001).
- 11 46. Tolia, A., Chávez-Gutiérrez, L. & De Strooper, B. Contribution of Presenilin  
12 Transmembrane Domains 6 and 7 to a Water-containing Cavity in the  $\gamma$ -Secretase  
13 Complex. *J. Biol. Chem.* **281**, 27633–27642 (2006).
- 14 47. Buck, M. Trifluoroethanol and colleagues: cosolvents come of age. Recent studies with  
15 peptides and proteins. *Q. Rev. Biophys.* **31**, 297–355 (1998).
- 16 48. Stelzer, W., Poschner, B. C., Stalz, H., Heck, A. J. & Langosch, D. Sequence-specific  
17 conformational flexibility of SNARE transmembrane helices probed by  
18 hydrogen/deuterium exchange. *Biophys J* **95**, 1326–1335 (2008).
- 19 49. Poschner, B. C., Quint, S., Hofmann, M. W. & Langosch, D. Sequence-specific  
20 conformational dynamics of model transmembrane domains determines their membrane  
21 fusogenic function. *J Mol Biol* **386**, 733–741 (2009).

- 1 50. Xiao, H. Mapping protein energy landscapes with amide hydrogen exchange and mass  
2 spectrometry: I. A generalized model for a two-state protein and comparison with  
3 experiment. *Protein Sci.* **14**, 543–557 (2005).
- 4 51. Konermann, L., Pan, J. & Liu, Y.-H. Hydrogen exchange mass spectrometry for studying  
5 protein structure and dynamics. *Chem. Soc. Rev.* **40**, 1224–1234 (2011).
- 6 52. Skinner, J. J., Lim, W. K., Bédard, S., Black, B. E. & Englander, S. W. Protein dynamics  
7 viewed by hydrogen exchange. *Protein Sci.* **21**, 996–1005 (2012).
- 8 53. Yücel, S. S. *et al.* Metastable XBP1u transmembrane domain mediates insertion into the  
9 ER membrane and intramembrane proteolysis by the signal peptide peptidase Sara.  
10 *bioRxiv* (2018). doi:10.1101/322107
- 11 54. Loh, S. N. & Markley, J. L. Hydrogen Bonding in Proteins As Studied by Amide  
12 Hydrogen D/H Fractionation Factors: Application to Staphylococcal Nuclease.  
13 *Biochemistry* **33**, 1029–1036 (1994).
- 14 55. Cao, Z. & Bowie, J. U. An energetic scale for equilibrium H/D fractionation factors  
15 illuminates hydrogen bond free energies in proteins. *Protein Sci.* **23**, 566–575 (2014).
- 16 56. Teilum, K., Kragelund, B. B. & Poulsen, F. M. in *Protein Folding Handbook* 634–672  
17 (Wiley-VCH Verlag GmbH). doi:10.1002/9783527619498.ch18
- 18 57. Quint, S. *et al.* Residue-specific side-chain packing determines the backbone dynamics  
19 of transmembrane model helices. *Biophys. J.* **99**, 2541–2549 (2010).
- 20 58. Cao, Z. & Bowie, J. U. Shifting hydrogen bonds may produce flexible transmembrane  
21 helices. *Proc. Natl. Acad. Sci.* **109**, 8121–8126 (2012).

- 1 59. Högel, P. *et al.* Glycine Perturbs Local and Global Conformational Flexibility of a  
2 Transmembrane Helix. *Biochemistry* **57**, 1326–1337 (2018).
- 3 60. Kornilova, A. Y., Bihel, F., Das, C. & Wolfe, M. S. The initial substrate-binding site of  
4  $\gamma$ -secretase is located on presenilin near the active site. *Proc. Natl. Acad. Sci.* **102**, 3230–  
5 3235 (2005).
- 6 61. Yan, Y., Xu, T.-H., Melcher, K. & Xu, H. E. Defining the minimum substrate and charge  
7 recognition model of gamma-secretase. *Acta Pharmacol. Sin.* 1–13 (2017).  
8 doi:10.1038/aps.2017.35
- 9 62. Hayward, S. & Lee, R. A. Improvements in the analysis of domain motions in proteins  
10 from conformational change: DynDom version 1.50. *J. Mol. Graph. Model.* **21**, 181–183  
11 (2002).
- 12 63. Krivobokova, T., Briones, R., Hub, J. S., Munk, A. & de Groot, B. L. Partial Least-  
13 Squares Functional Mode Analysis: Application to the Membrane Proteins AQP1, Aqy1,  
14 and CLC-ec1. *Biophys. J.* **103**, 786–796 (2012).
- 15 64. Edison, A. S., Weinhold, F. & Markley, J. L. Theoretical Studies of Protium/Deuterium  
16 Fractionation Factors and Cooperative Hydrogen Bonding in Peptides. *J. Am. Chem. Soc.*  
17 **117**, 9619–9624 (1995).
- 18 65. Brown, M. C. *et al.* Unwinding of the Substrate Transmembrane Helix in Intramembrane  
19 Proteolysis. *Biophys. J.* **114**, 1579–1589 (2018).
- 20 66. Rand, K. D., Zehl, M., Jensen, O. N. & Jorgensen, T. J. Loss of ammonia during electron-  
21 transfer dissociation of deuterated peptides as an inherent gauge of gas-phase hydrogen  
22 scrambling. *Anal Chem* **82**, 9755–9762 (2010).

- 1 67. Frey, B. J. & Dueck, D. Clustering by passing messages between data points. *Science*  
2 **315**, 972–976 (2007).
- 3 68. Phillips, J. C. *et al.* Scalable molecular dynamics with NAMD. *J. Comput. Chem.* **26**,  
4 1781–802 (2005).
- 5 69. Best, R. B. *et al.* Optimization of the additive CHARMM all-atom protein force field  
6 targeting improved sampling of the backbone  $\phi$ ,  $\psi$  and side-chain  $\chi(1)$  and  $\chi(2)$  dihedral  
7 angles. *J. Chem. Theory Comput.* **8**, 3257–3273 (2012).
- 8 70. Lee, J. *et al.* CHARMM-GUI Input Generator for NAMD, GROMACS, AMBER,  
9 OpenMM, and CHARMM/OpenMM Simulations Using the CHARMM36 Additive  
10 Force Field. *J. Chem. Theory Comput.* **12**, 405–413 (2016).
- 11 71. Goetz, A. & Scharnagl, C. Dissecting Conformational Changes in APP's  
12 Transmembrane Domain Linked to  $\epsilon$ -Efficiency in Familial Alzheimer's Disease. (2018).  
13 doi:10.1101/269084
- 14 72. Romo, T. D. & Grossfield, A. Block Covariance Overlap Method and Convergence in  
15 Molecular Dynamics Simulation. *J. Chem. Theory Comput.* **7**, 2464–2472 (2011).
- 16 73. McGibbon, R. T. *et al.* MDTraj: A Modern Open Library for the Analysis of Molecular  
17 Dynamics Trajectories. *Biophys. J.* **109**, 1528–1532 (2015).
- 18 74. Humphrey, W., Dalke, A. & Schulten, K. VMD: Visual molecular dynamics. *J. Mol.*  
19 *Graph.* **14**, 33–38 (1996).
- 20 75. DiCiccio, T. J. *et al.* Better Bootstrap Confidence Intervals. *Stat. Sci.* **11**, 189–228 (1996).
